# Supplementary material
Source: publisher site journal article supplement (http://www.kjim.org/upload/media/kjim-2020-470-suppl1.pdf)
Supplement: Supplementary file 1 [file kjim-2020-470-suppl1.pdf]

**Supplementary Table 1. Considerations when issuing oxygen prescription**

| Variables for prescription criteria                             | No. (%)   |
|-----------------------------------------------------------------|-----------|
| Following the patient's condition (severity)                    | 7 (23.3)  |
| To maintain oxygen saturation                                   | 13 (43.3) |
| Following the arterial blood gas analysis                       | 3 (10.0)  |
| Following the oxygen saturation and arterial blood gas analysis | 3 (10.0)  |
| Etc. <sup>a</sup>                                               | 4 (13.3)  |

<sup>a</sup>Included 'Consider sleeping and resting time,' 'Prescribe at the flow rate used during hospitalization,' or 'Decide more than 15 L/day within the range that hypercapnia is not observed.'
